# Supplementary material for: A gene co-expression module implicating the mitochondrial electron transport chain is associated with long-term response to lithium treatment in bipolar affective disorder
Source: PubMed Central journal article supplement (PMC6125294; doi:10.1038/s41398-018-0237-0), 2018-09-05

# Supplementary Figure 3

**Module membership vs. gene significance**  
**cor=0.18, p=0.23**

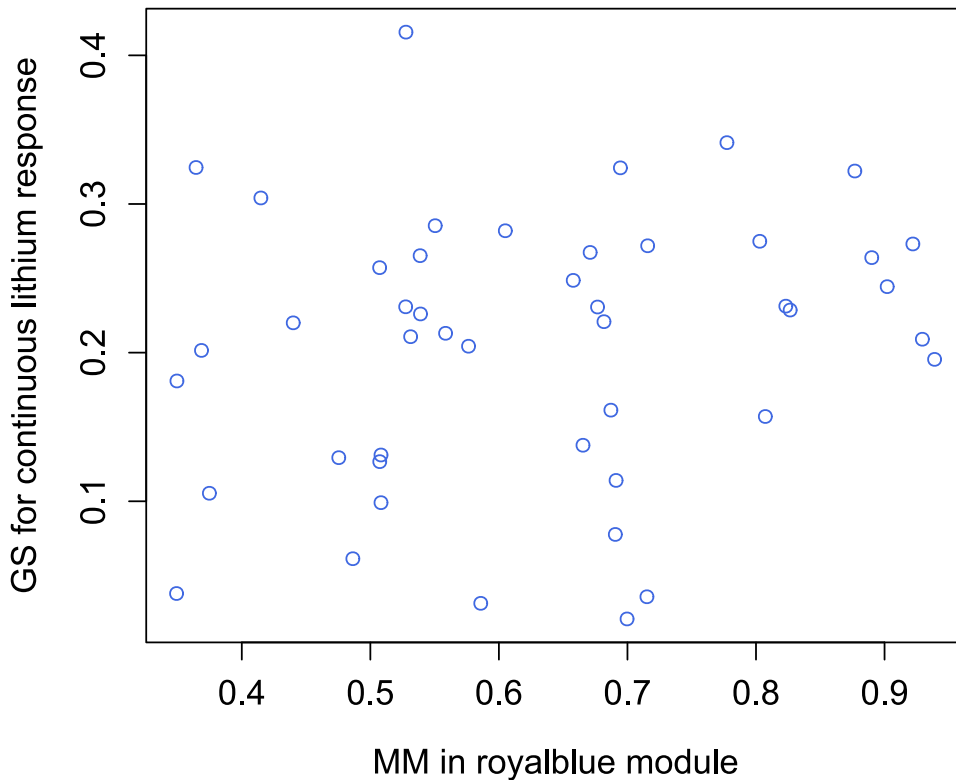

Supplement: 41398_2018_237_MOESM1_ESM.pdf [file 41398_2018_237_MOESM1_ESM.pdf]
